# Supplementary material
Source: Springer Nature journal article supplement (https://www.springerprofessional.de/resource/supplementary/13638_2012_754_MOESM7_ESM.pdf/11898386)

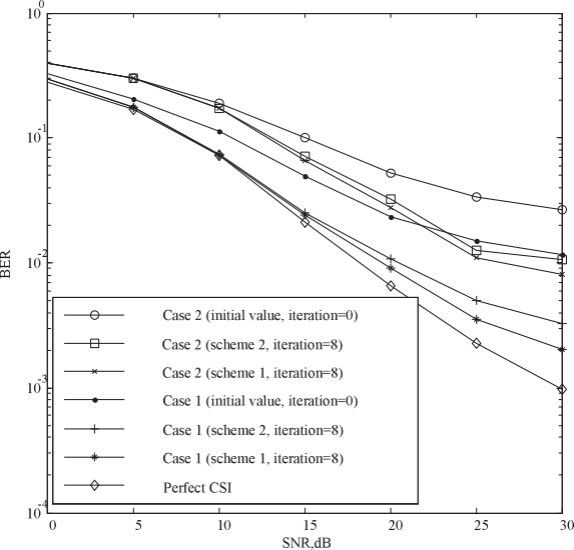

Supplement: MOESM7 [file 11898386]
